# Supplementary material for: Thermodynamics of Saline and Fresh Water Mixing in Estuaries
Source: Copernicus journal article supplement (doi:10.5194/esd-2017-87), 2017-10-17
Supplement: Supplementary file 1 [file esd-2017-87-supplement.pdf]

## Supplement with " **Thermodynamics of Saline and Fresh Water Mixing in Estuaries** "

By: Zhilin Zhang and Hubert H.G. Savenije

In this supplement we present the geometry of 23 estuaries in our database and the application of the new equation for the dispersion based on the maximum power (MP) concept in these estuaries.

The geometrical data of the estuaries are presented in the Table S1, containing the cross-sectional convergence length of the seaward segment  $a_0$ , the cross-sectional area at the inflection point  $A_1$ , the cross-sectional convergence length of the main estuary segment  $a_1$ , the cross-sectional area of the river reach  $A_f$ , the same variables for the width, the location of the inflection point  $x_1$ , and the depth at the inflection point  $h_1$ .

Table S2 presents the data for the applications of the MP equation to observations of salinity distributions in these estuaries. The table presents: the label referring to the estuary in Table S1, the date of observation, the tidal excursion  $E_0$ , the tidal period  $T$ , the river discharge  $Q$ , the damping of the tidal wave  $\delta_H$ , the salinity at the inflection point  $S_1$ , the boundary condition at the inflection point  $D_1$ , which follows from calibration.

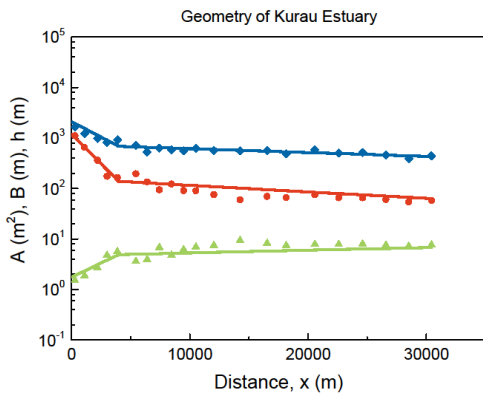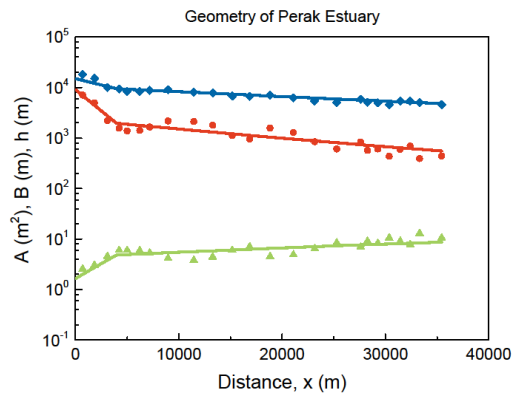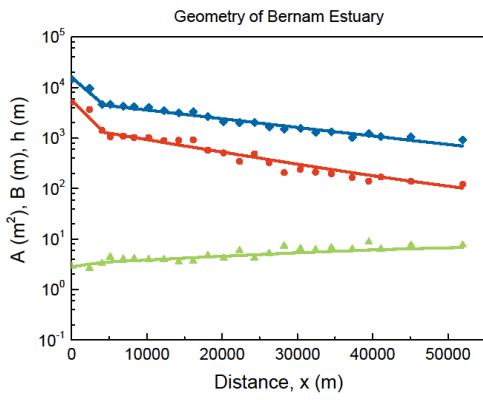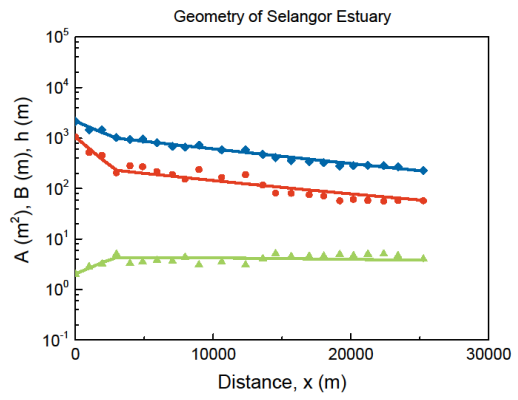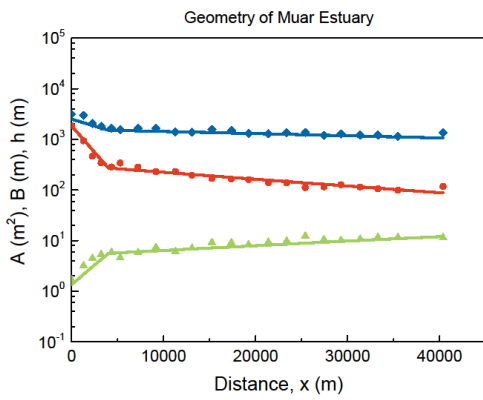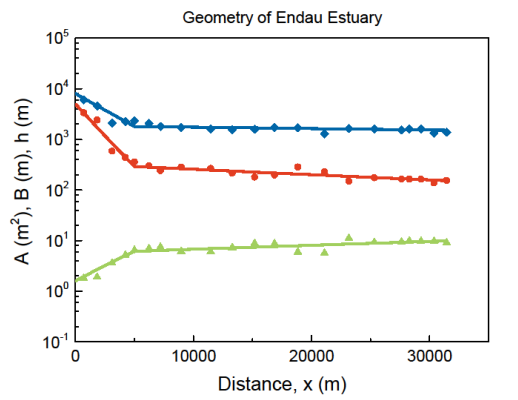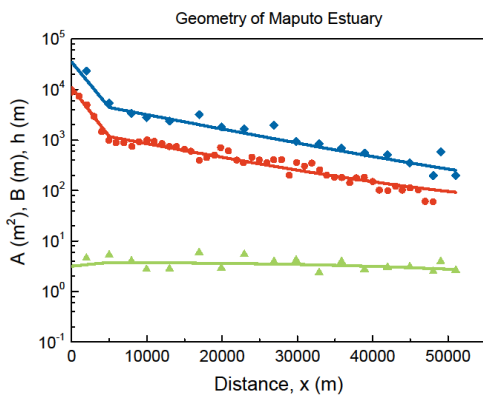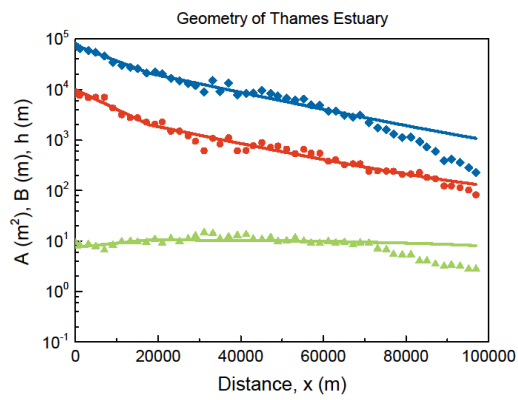

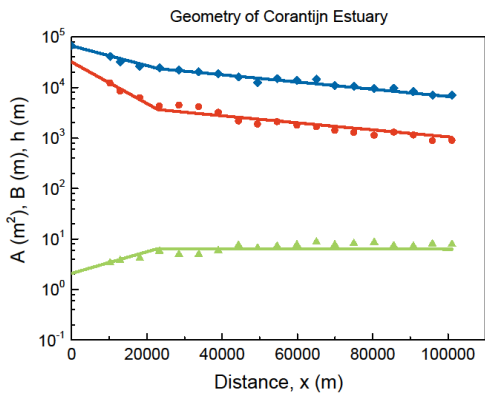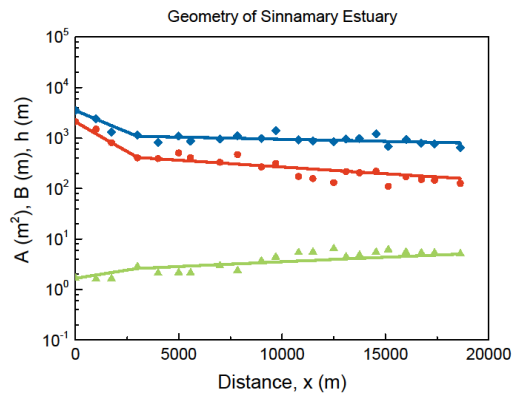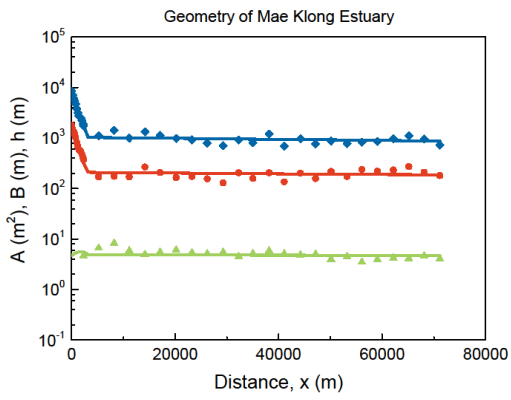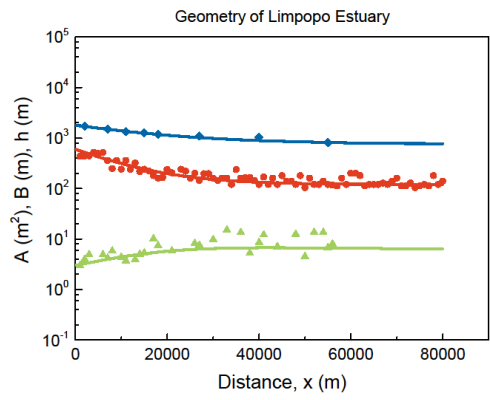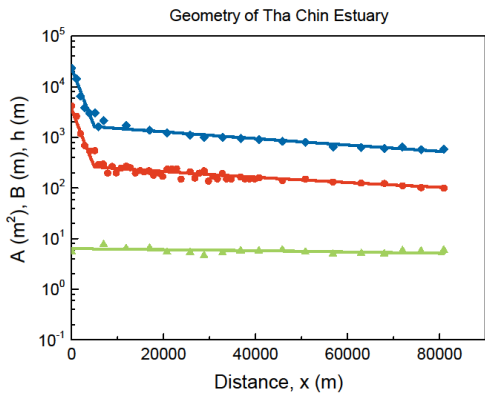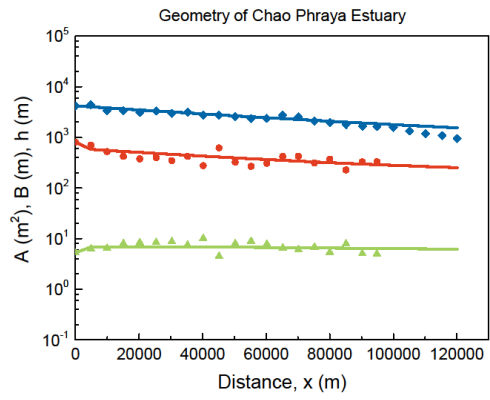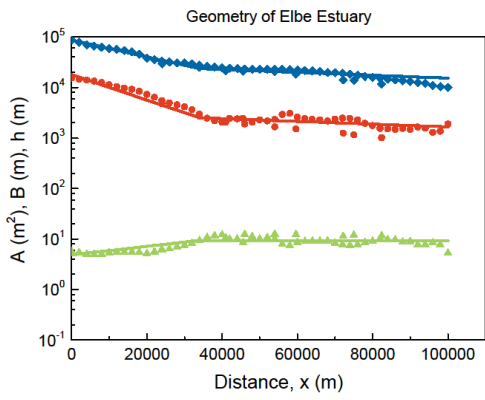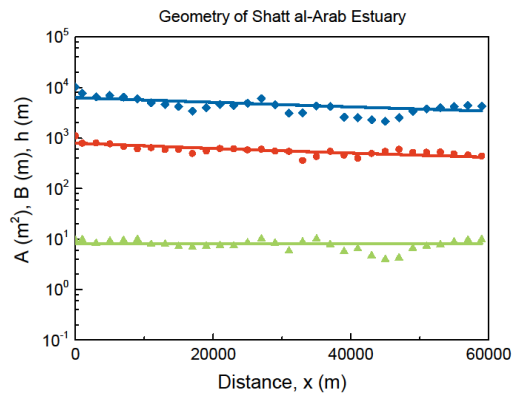

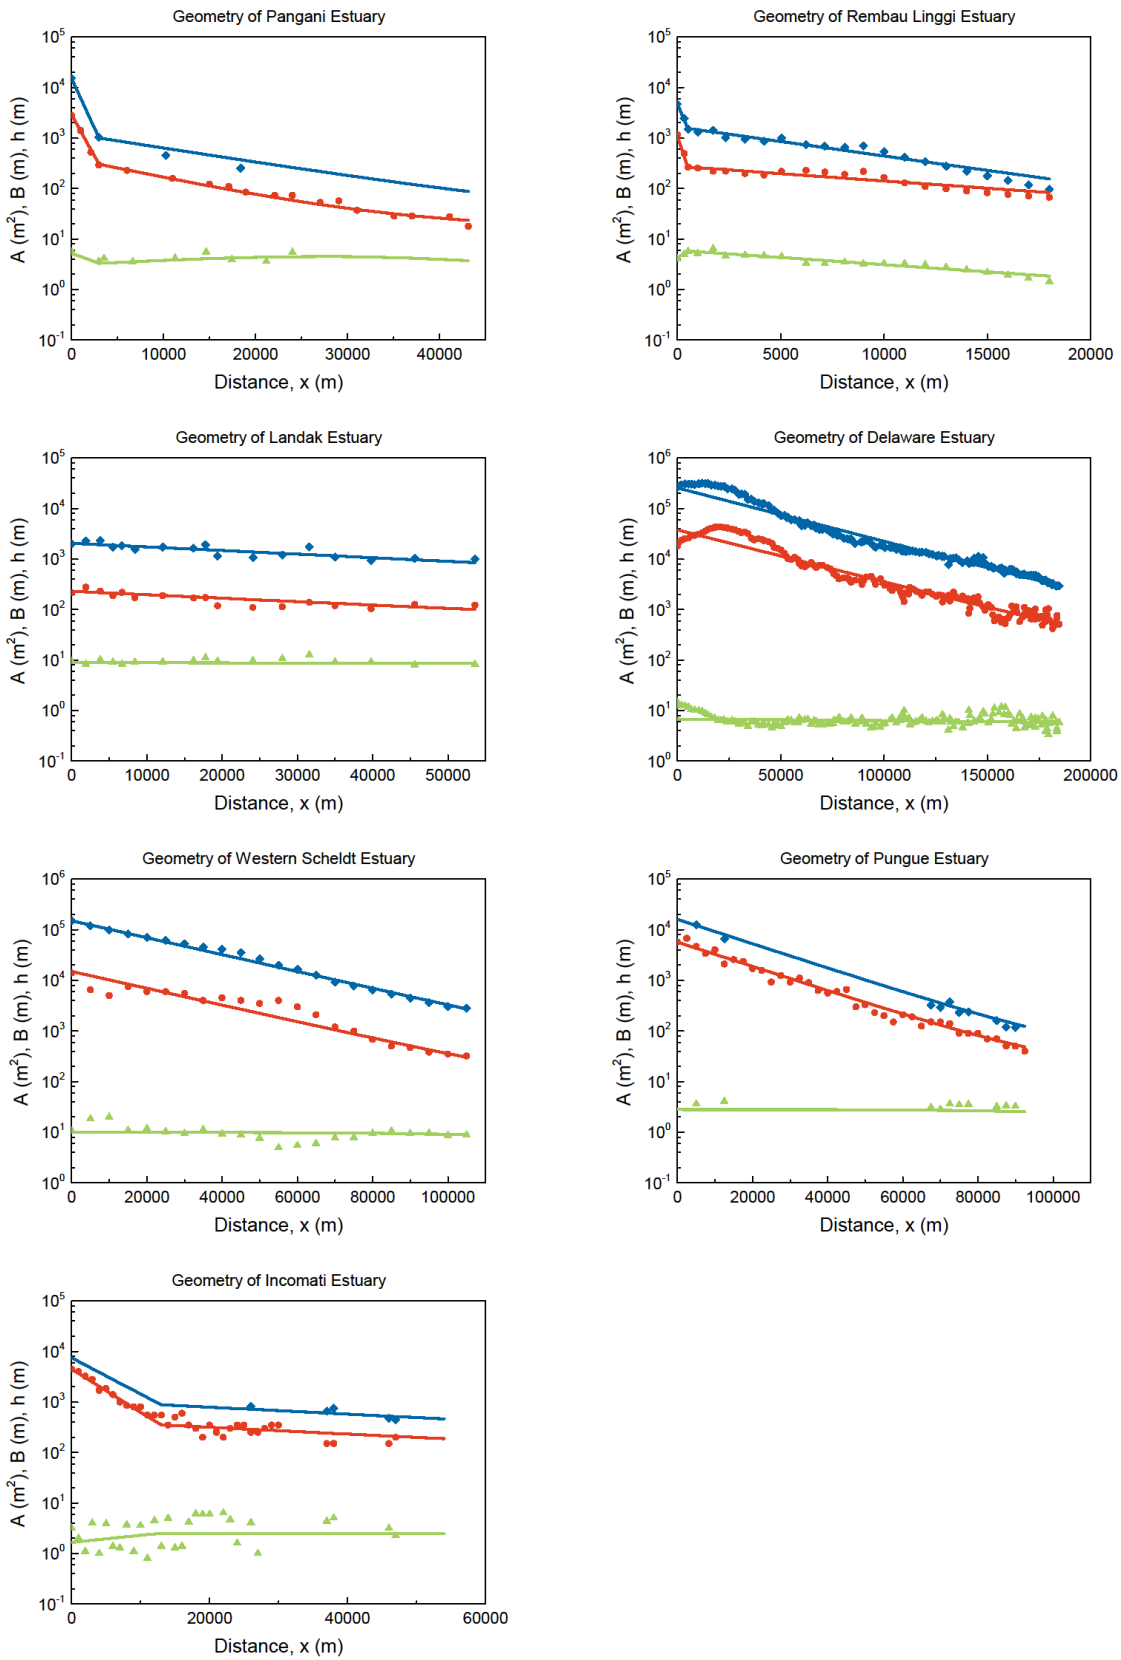

Figure S1. The geometrical data of the 23 estuaries

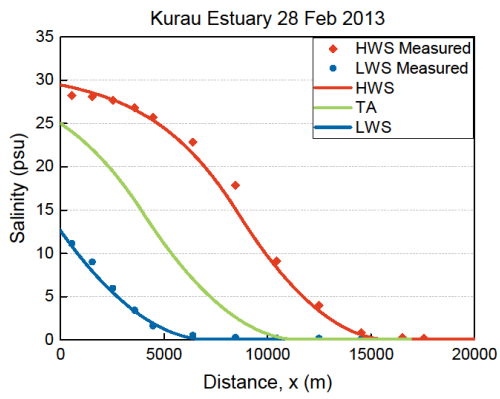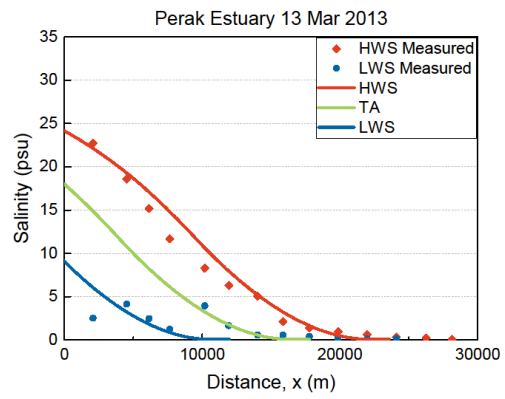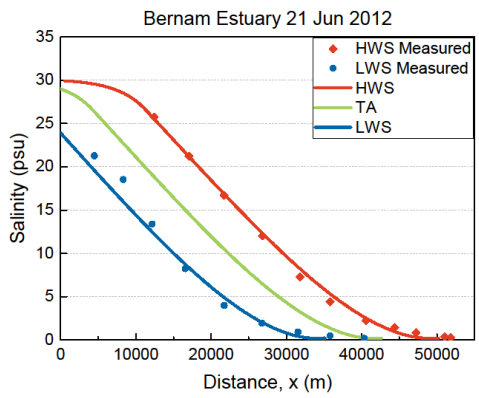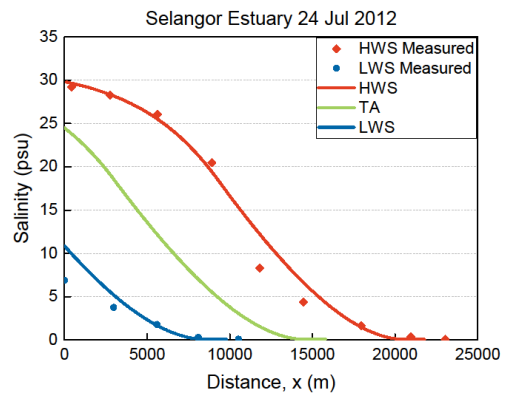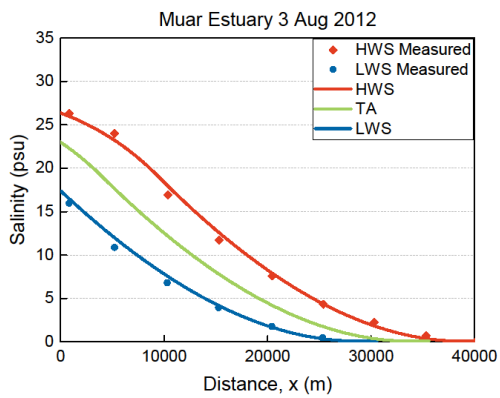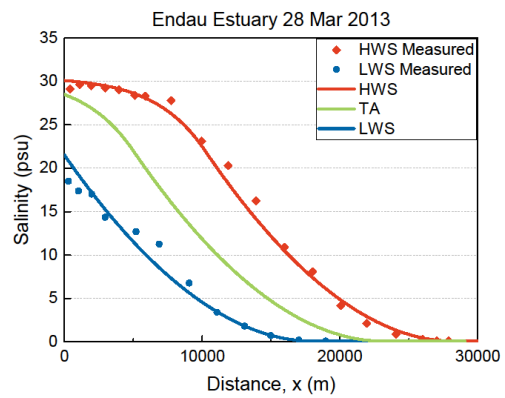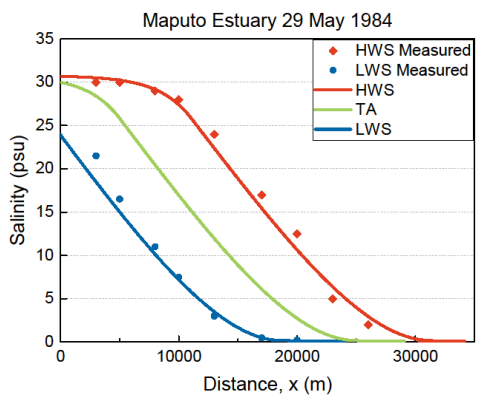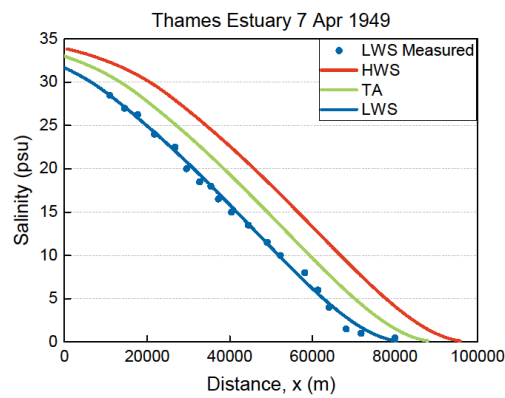

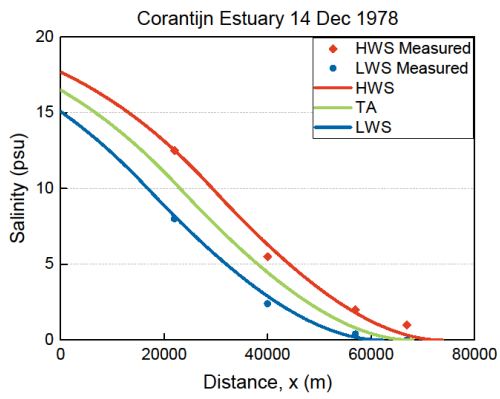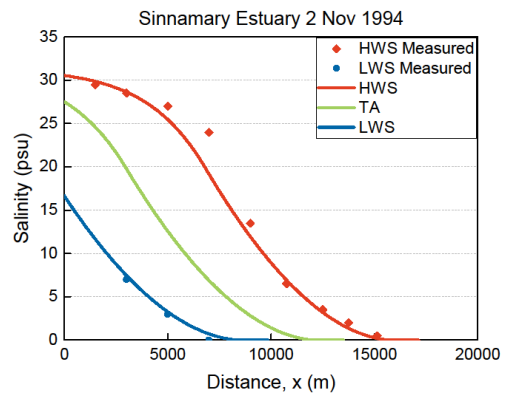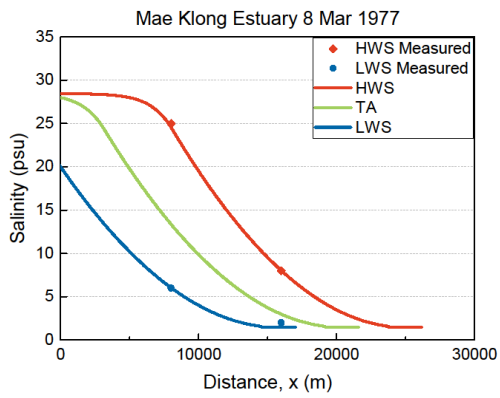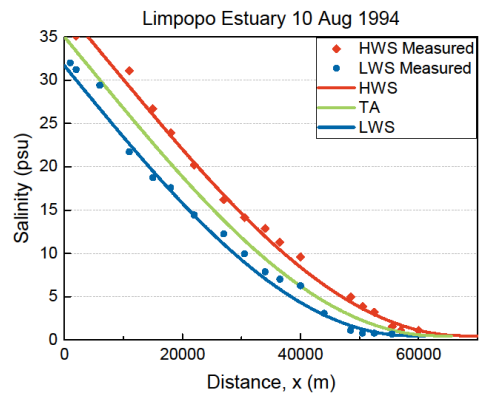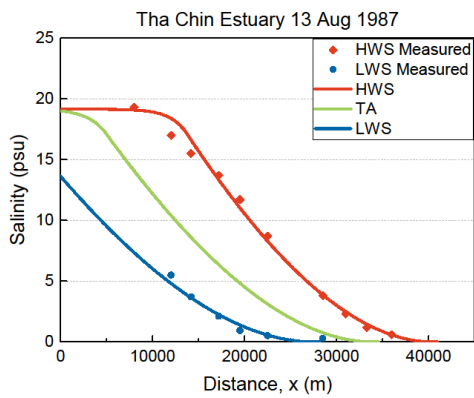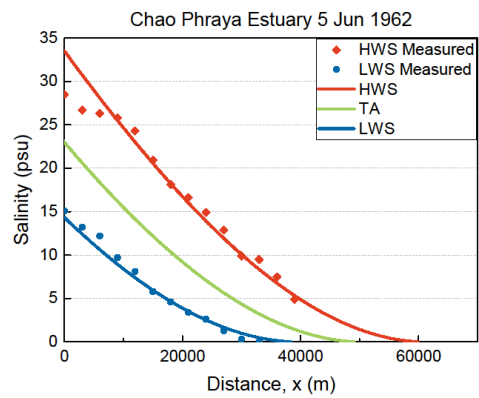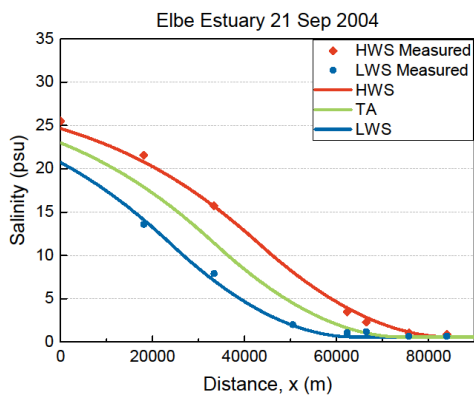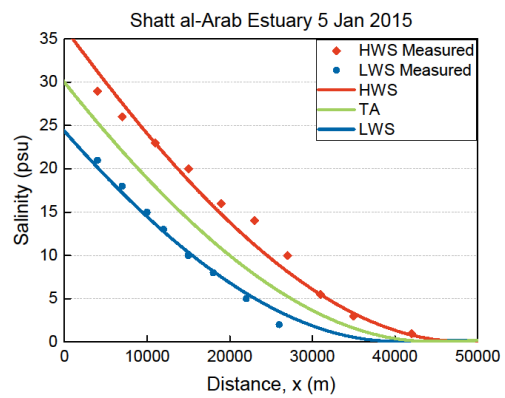

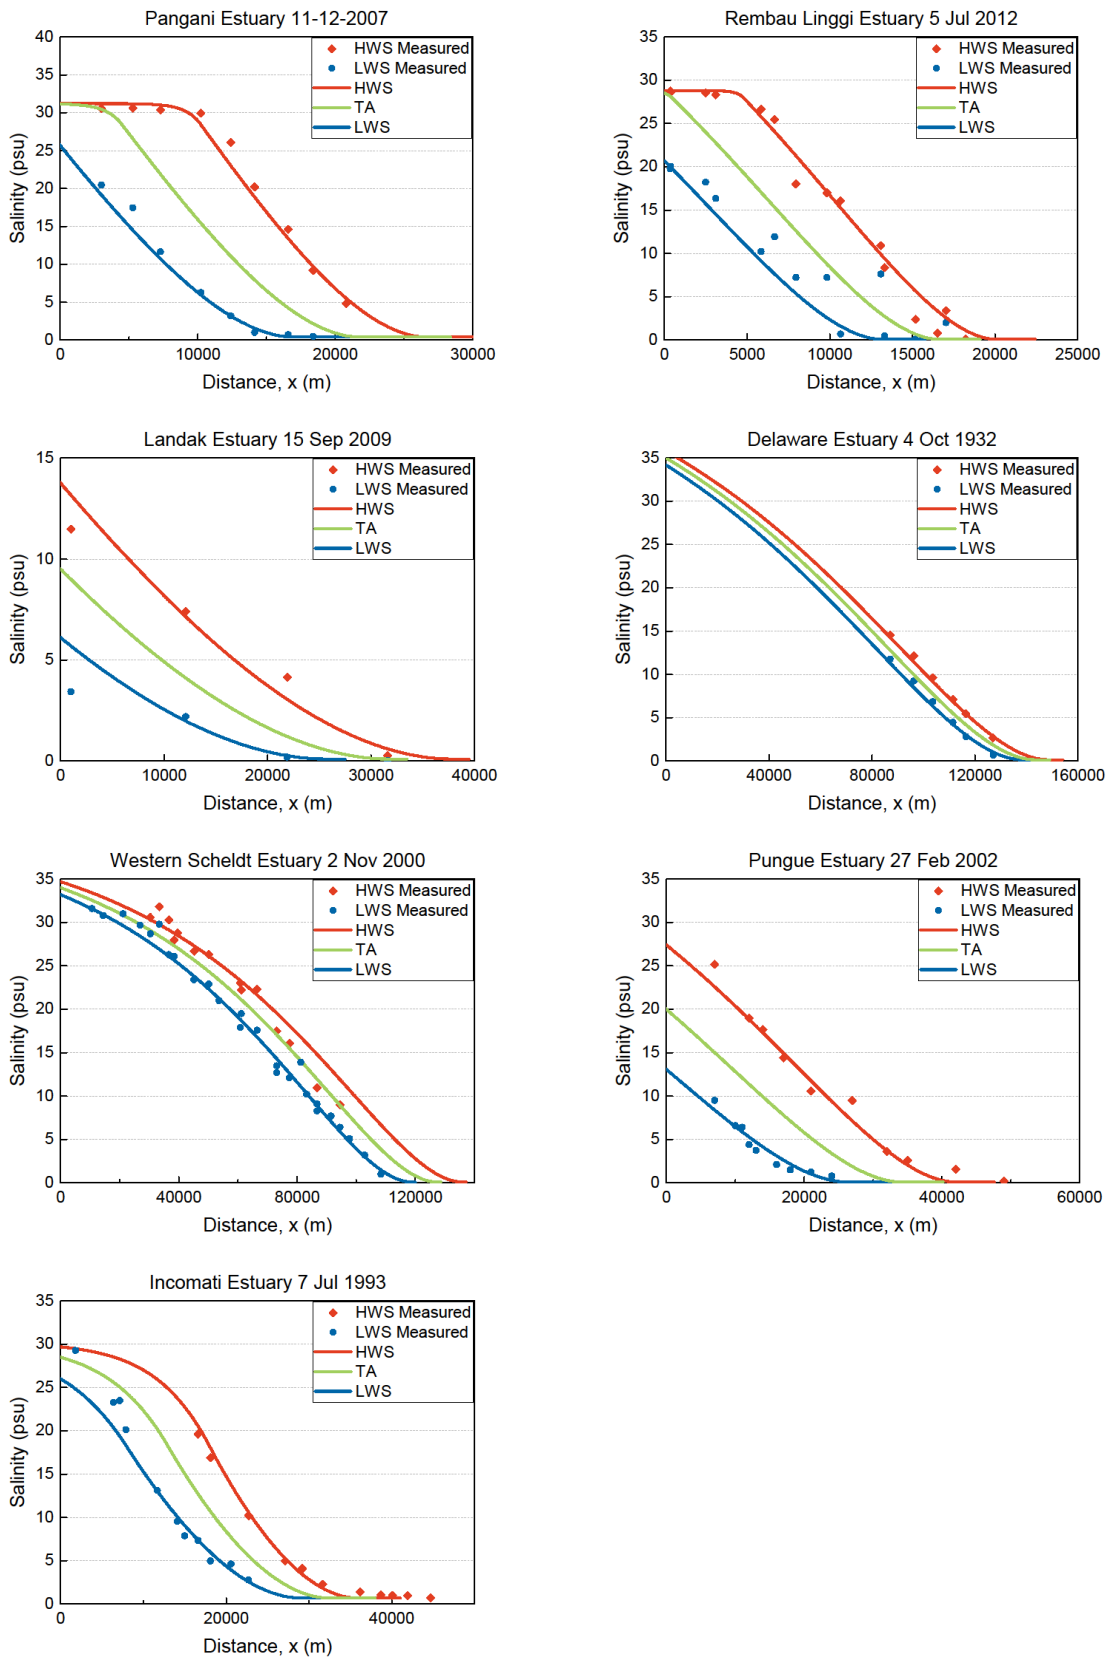

Figure S2. Applications of the MP equation in the 23 estuaries to observed salinity observations

Table S1. Geometrical data of 23 estuaries.

| Estuary             | $a_0$<br>m | $A_1$<br>m <sup>2</sup> | $a_1$<br>m | $A_f$<br>m <sup>2</sup> | $b_0$<br>m | $B_1$<br>m | $b_1$<br>m | $B_f$<br>m | $x_1$<br>m | $h_1$<br>m |
|---------------------|------------|-------------------------|------------|-------------------------|------------|------------|------------|------------|------------|------------|
| 1 Kurau             | 3500       | 683                     | 55000      | 20                      | 1800       | 139        | 30000      | 10         | 4000       | 4.9        |
| 2 Perak             | 8000       | 9452                    | 40000      | 900                     | 2500       | 1957       | 21000      | 150        | 4000       | 4.8        |
| 3 Bernam            | 3400       | 4482                    | 25000      | 30                      | 2900       | 1291       | 17000      | 25         | 4300       | 3.5        |
| 4 Selangor          | 3800       | 990                     | 14000      | 25                      | 1900       | 228        | 14000      | 15         | 3000       | 4.3        |
| 5 Muar              | 8000       | 1522                    | 100000     | 15                      | 2050       | 271        | 30000      | 10         | 4000       | 5.6        |
| 6 Endau             | 3300       | 1797                    | 150000     | 50                      | 1700       | 292        | 35000      | 30         | 5000       | 6.1        |
| 7 Maputo            | 2400       | 4402                    | 15000      | 50                      | 2200       | 1169       | 15000      | 40         | 5000       | 3.8        |
| 8 Thames            | 14000      | 20879                   | 25000      | 200                     | 11000      | 1987       | 25000      | 50         | 18000      | 10.5       |
| 9 Corantijn         | 22000      | 23650                   | 60000      | 150                     | 10500      | 3642       | 60000      | 70         | 23000      | 6.5        |
| 10 Sinnamary        | 2500       | 1082                    | 50000      | 40                      | 1800       | 413        | 15000      | 20         | 3000       | 2.6        |
| 11 Mae Klong        | 1350       | 1030                    | 300000     | 260                     | 1050       | 209        | 200000     | 130        | 3200       | 4.9        |
| 12 Limpopo          | 20000      | 1800                    | 20000      | 750                     | 11000      | 600        | 11000      | 120        | 0          | 3.0        |
| 13 Tha Chin         | 1850       | 1626                    | 60000      | 90                      | 1800       | 261        | 60000      | 40         | 5000       | 6.2        |
| 14 Chao Phraya      | 90000      | 4005                    | 90000      | 600                     | 12000      | 579        | 80000      | 150        | 5000       | 6.9        |
| 15 Elbe             | 26000      | 23674                   | 150000     | 200                     | 17000      | 2523       | 150000     | 100        | 34000      | 9.4        |
| 16 Shatt al-Arab    | 80000      | 6300                    | 80000      | 800                     | 60000      | 790        | 60000      | 200        | 0          | 8.0        |
| 17* Pangani         | 1100       | 1000                    | 15000      | 20                      | 1300       | 303        | 11000      | 16         | 3000       | 3.3        |
| 18* Rembau Linggi   | 450        | 1551                    | 7500       | 5                       | 350        | 267        | 14500      | 5          | 500        | 5.8        |
| 19* Landak          | 60000      | 2050                    | 60000      | 20                      | 60000      | 230        | 60000      | 10         | 0          | 8.9        |
| 20* Delaware        | 41000      | 255000                  | 41000      | 180                     | 42000      | 37655      | 42000      | 60         | 0          | 6.8        |
| 21* Western Scheldt | 26000      | 150000                  | 26000      | 80                      | 26000      | 15000      | 26000      | 40         | 0          | 10.0       |
| 22* Pungwe          | 18000      | 16000                   | 18000      | 30                      | 18000      | 5700       | 18000      | 15         | 0          | 2.8        |
| 23* Incomati        | 6000       | 886                     | 60000      | 30                      | 5000       | 353        | 60000      | 20         | 13000      | 2.5        |

Note: The estuaries with star-marked label are considered less reliable sets, while others are reliable sets.



Table S2. Data required for the application of the salt intrusion model to the observations in 23 estuaries

| Label | Date       | $E_0$<br>m | $T$<br>s | $Q$<br>m <sup>3</sup> /s | $\delta_H$<br>(10 <sup>-6</sup> ) 1/m | $S_1$<br>psu | $D_1$<br>m <sup>2</sup> /s |
|-------|------------|------------|----------|--------------------------|---------------------------------------|--------------|----------------------------|
| 1     | 28/02/2013 | 9400       | 44440    | 50                       | -6.3                                  | 16.1         | 309                        |
| 2     | 13/03/2013 | 11000      | 44440    | 316                      | 3                                     | 11.7         | 228                        |
| 3     | 21/06/2012 | 14000      | 44400    | 42                       | 1.7                                   | 26.5         | 261                        |
| 4     | 24/07/2012 | 12700      | 44440    | 42                       | -3.7                                  | 18.5         | 310                        |
| 5     | 03/08/2012 | 11000      | 44440    | 35                       | -2.68                                 | 19.1         | 370                        |
| 6     | 28/03/2013 | 10500      | 44400    | 54                       | -1.3                                  | 18.0         | 261                        |
| 7a    | 28/04/1982 | 13000      | 44440    | 25                       | 2                                     | 28.9         | 74                         |
| 7b    | 15/07/1982 | 8000       | 44440    | 8                        | 2                                     | 31.9         | 43                         |
| 7c    | 19/04/1984 | 13000      | 44440    | 120                      | 2                                     | 22.0         | 284                        |
| 7d    | 17/05/1984 | 13000      | 44440    | 50                       | 2                                     | 24.1         | 129                        |
| 7e    | 29/05/1984 | 12000      | 44440    | 40                       | 2                                     | 25.8         | 130                        |
| 8     | 07/04/1949 | 14000      | 44400    | 50                       | 1.1                                   | 28.5         | 186                        |
| 9a    | 09/12/1978 | 12000      | 44440    | 150                      | -1.7                                  | 11.6         | 157                        |
| 9b    | 14/12/1978 | 13000      | 44440    | 130                      | -1.7                                  | 10.0         | 151                        |
| 9c    | 20/12/1978 | 13000      | 44440    | 220                      | -1.7                                  | 8.4          | 231                        |
| 10a   | 12/11/1993 | 8600       | 44440    | 168                      | -5                                    | 7.2          | 225                        |
| 10b   | 27/04/1994 | 11000      | 44440    | 148                      | -5                                    | 5.6          | 189                        |
| 10c   | 02/11/1994 | 7800       | 44440    | 112                      | -5                                    | 19.8         | 528                        |
| 10d   | 03/11/1994 | 10000      | 44440    | 112                      | -5                                    | 13.8         | 343                        |
| 11a   | 08/03/1977 | 10000      | 44400    | 60                       | -4.2                                  | 24.7         | 520                        |
| 11b   | 09/04/1977 | 8000       | 44400    | 36                       | -4.2                                  | 26.2         | 493                        |
| 12a   | 31/12/1982 | 8000       | 44440    | 2                        | 1.7                                   | 35.0         | 55                         |
| 12b   | 14/07/1994 | 7000       | 44440    | 5                        | 1.7                                   | 35.0         | 85                         |
| 12c   | 24/07/1994 | 8000       | 44440    | 5                        | 1.7                                   | 35.0         | 100                        |
| 12d   | 10/08/1994 | 8000       | 44440    | 3                        | 1.7                                   | 35.0         | 70                         |
| 13a   | 16/04/1981 | 15000      | 86400    | 55                       | -5.5                                  | 26.2         | 888                        |
| 13b   | 27/02/1986 | 18500      | 44400    | 40                       | -10.6                                 | 22.8         | 479                        |
| 13c   | 01/03/1986 | 14000      | 86400    | 40                       | -5.5                                  | 25.8         | 531                        |
| 13d   | 13/08/1987 | 18500      | 44400    | 39                       | -10.6                                 | 17.1         | 396                        |
| 14a   | 05/06/1962 | 24000      | 86400    | 63                       | -2.2                                  | 19.1         | 401                        |
| 14b   | 16/01/1967 | 14000      | 86400    | 180                      | -2.2                                  | 8.7          | 503                        |
| 14c   | 23/02/1983 | 19000      | 86400    | 100                      | -2.2                                  | 17.1         | 573                        |
| 14d   | 29/01/1983 | 26000      | 86400    | 90                       | -2.2                                  | 20.3         | 641                        |
| 15a   | 21/09/2004 | 20000      | 44440    | 200                      | 2                                     | 11.2         | 185                        |
| 15b   | 21/09/2004 | 18000      | 44440    | 200                      | 2                                     | 11.1         | 185                        |
| 16a   | 26/03/2014 | 10000      | 44000    | 114                      | -5                                    | 24.5         | 380                        |
| 16b   | 16/05/2014 | 10000      | 44000    | 96                       | -5                                    | 29.0         | 380                        |
| 16c   | 24/09/2014 | 15500      | 44000    | 58                       | -5                                    | 35.0         | 450                        |
| 16d   | 05/01/2015 | 10000      | 44000    | 63                       | -5                                    | 30.0         | 250                        |
| 17a   | 27/10/2007 | 14000      | 44440    | 15                       | -10                                   | 28.7         | 203                        |
| 17b   | 11/12/2007 | 12000      | 44440    | 11                       | -10                                   | 28.4         | 130                        |

|     |            |       |       |     |       |      |     |
|-----|------------|-------|-------|-----|-------|------|-----|
| 18  | 05/07/2012 | 8700  | 44440 | 26  | -14   | 27.9 | 246 |
| 19  | 15/09/2009 | 15000 | 86400 | 10  | -6.7  | 9.5  | 90  |
| 20a | 23/08/1932 | 8000  | 44440 | 120 | 0.7   | 13.0 | 100 |
| 20b | 04/10/1932 | 9000  | 44440 | 72  | 0.7   | 35.0 | 55  |
| 21a | 01/07/1987 | 10000 | 44440 | 90  | 2.8   | 31.0 | 150 |
| 21b | 02/11/2000 | 12000 | 44440 | 220 | 2.8   | 34.0 | 400 |
| 22a | 27/02/2002 | 21000 | 44440 | 200 | -8.5  | 20.0 | 360 |
| 22b | 01/03/2002 | 27000 | 44440 | 150 | -8.5  | 20.0 | 420 |
| 23a | 05/09/1982 | 9000  | 44440 | 2   | -19.9 | 26.2 | 43  |
| 23b | 23/06/1993 | 11000 | 44440 | 4   | -19.9 | 20.2 | 49  |
| 23c | 07/07/1993 | 13000 | 44440 | 4   | -19.9 | 18.2 | 49  |

---
